# Supplementary material for: Constitutively active androgen receptor splice variants AR-V3, AR-V7 and AR-V9 are co-expressed in castration-resistant prostate cancer metastases
Source: PubMed Central journal article supplement (PMC6070921; doi:10.1038/s41416-018-0172-0), 2018-07-10

*a*

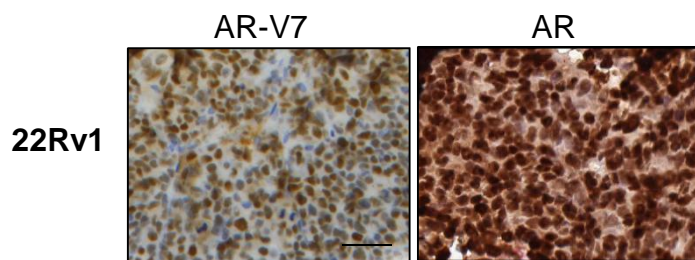

*b*

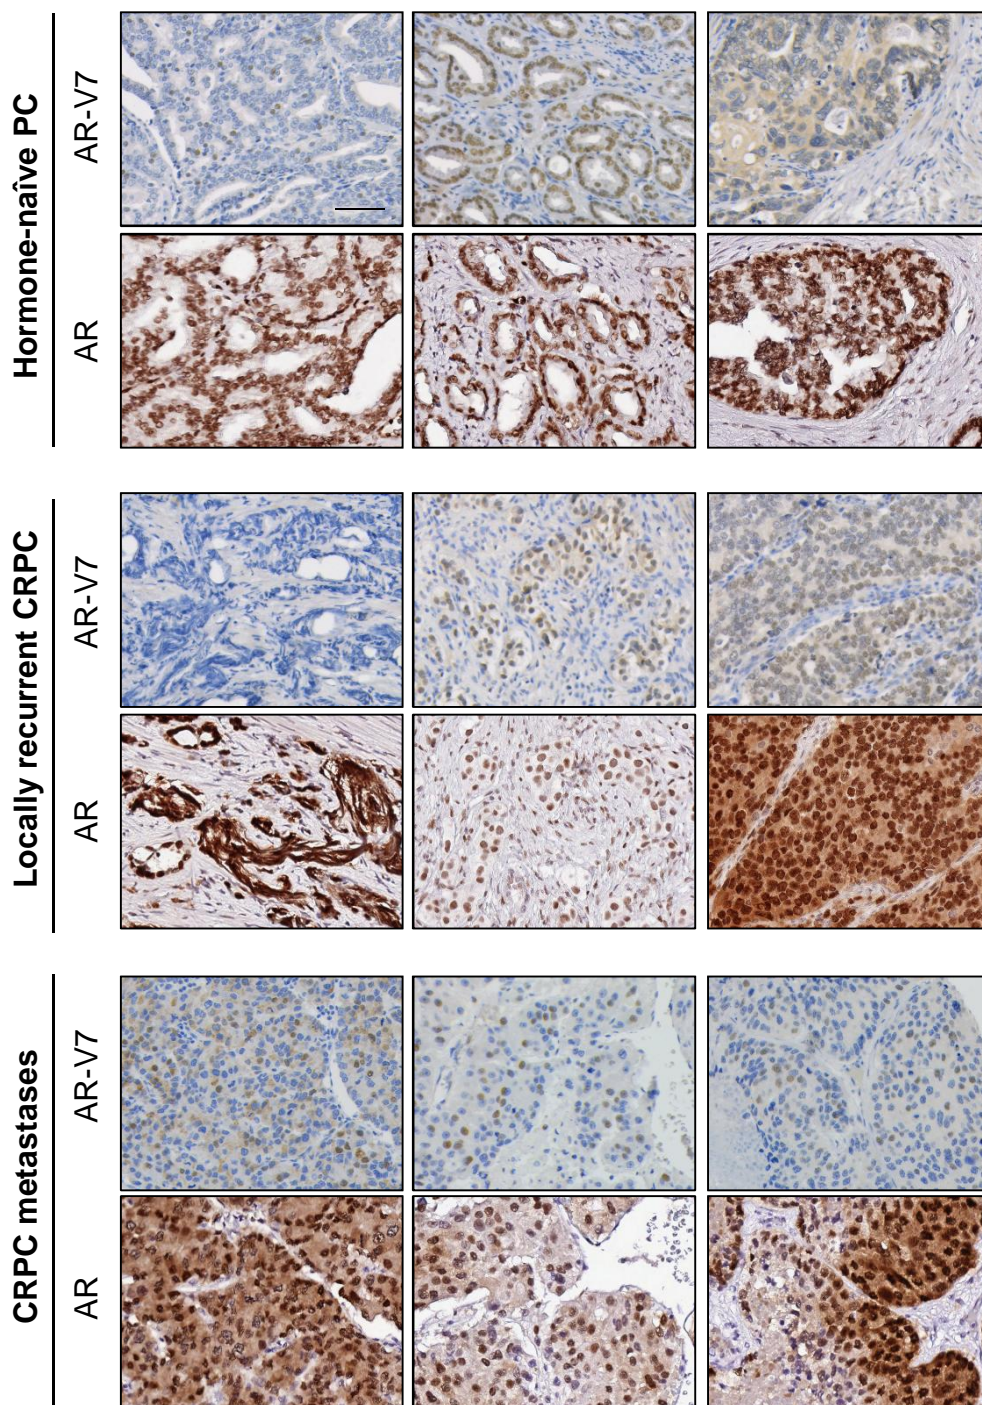

Supplement: 41416_2018_172_MOESM13_ESM.pdf [file 41416_2018_172_MOESM13_ESM.pdf]
